# Supplementary material
Source: PubMed Central journal article supplement (PMC3472595)
Supplement: supp_dev.086025_DEV086025.pdf [file supp_dev.086025_DEV086025.pdf]

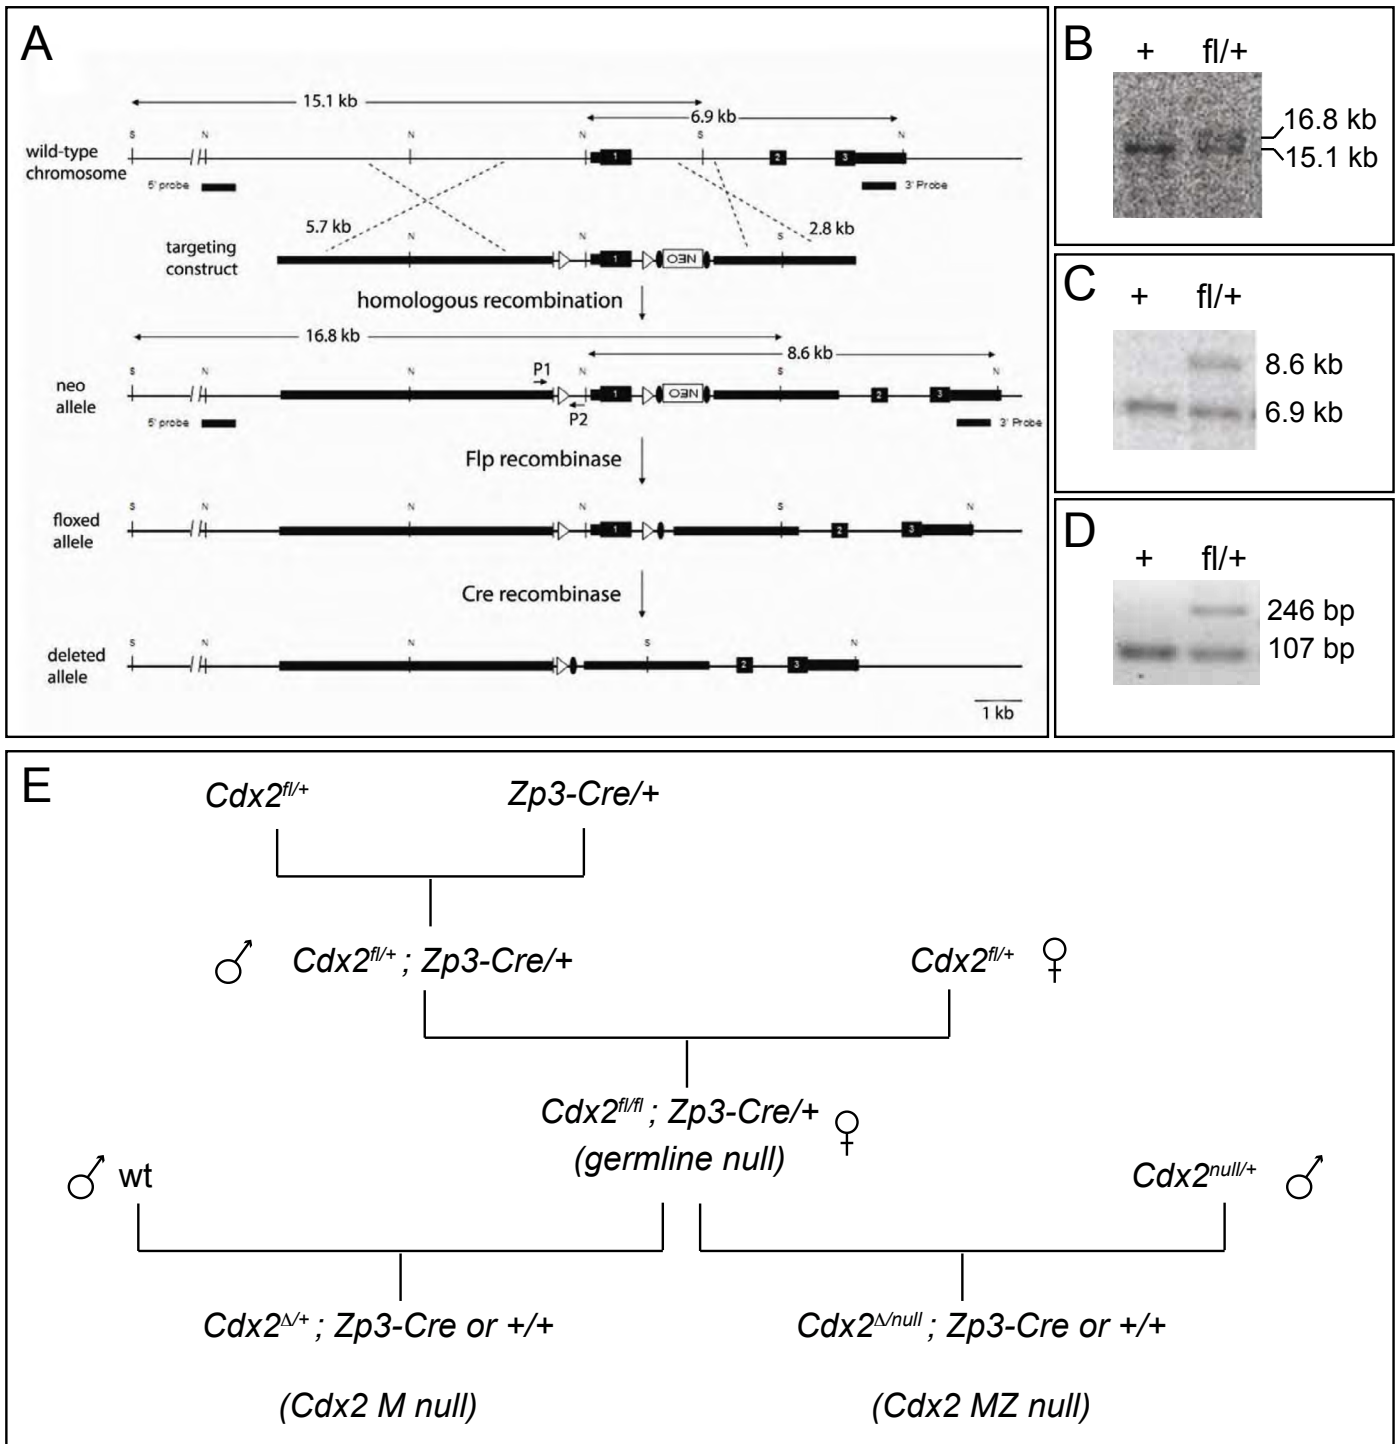

**Fig. S1. Germline ablation of *Cdx2*.** (A) Overview of the targeting strategy used to generate the *Cdx2<sup>fl</sup>* allele. The targeting construct contained 5.7 and 2.8 kb homology arms, loxP sites (triangles) flanking the *Cdx2* 5' UTR and exon 1, and a *neo* selection cassette flanked by FRT sites (ovals). Homologous recombination replaces the 15.1 kb *ScaI* fragment with a 16.8 kb fragment, detectable by Southern blot analysis with 5' probe, and replaces the 6.9 kb *NheI* fragment with an 8.6 kb fragment, detectable by Southern blot analysis with 3' probe. Homologous recombination also introduces a 247 bp P1/P2 PCR product (primer positions indicated), whereas the wild-type P1/P2 product is 107 bp. (B) Southern blot analysis of wild-type ES cell and a correctly targeted ES cell clone using the 5' probe. (C) Southern blot analysis of wild-type and targeted ES cell clone using the 3' probe. (D) PCR genotyping of wild-type and targeted ES cell clone using P1 and P2 primers. (E) Overview of crossing schemes used to create *Cdx2* germline null females and *Cdx2* M null and *Cdx2* MZ null animals or embryos.
